# Supplementary material for: How useful are systematic reviews for informing palliative care practice? Survey of 25 Cochrane systematic reviews
Source: PubMed Central journal article supplement (PMC2532992; doi:10.1186/1472-684x-7-13), 2008-08-20
Supplement: 1472-684X-7-13-S1.pdf [file 1472-684X-7-13-S1.pdf]

Additional file 1: Included reviews

| Reference                                                                                                                        | Condition palliated                          | Included studies                                       | Max number of patients            | Intervention                                                                         | Original authors' conclusion                                                                                                                                                                                                                                                 | Authors' comment on strength of evidence                                                                                                                                                                                                                                        | Author's implications for future research                                                                                                                                                                                                                                                                                                                                                                                                                                                                                                                                           |
|----------------------------------------------------------------------------------------------------------------------------------|----------------------------------------------|--------------------------------------------------------|-----------------------------------|--------------------------------------------------------------------------------------|------------------------------------------------------------------------------------------------------------------------------------------------------------------------------------------------------------------------------------------------------------------------------|---------------------------------------------------------------------------------------------------------------------------------------------------------------------------------------------------------------------------------------------------------------------------------|-------------------------------------------------------------------------------------------------------------------------------------------------------------------------------------------------------------------------------------------------------------------------------------------------------------------------------------------------------------------------------------------------------------------------------------------------------------------------------------------------------------------------------------------------------------------------------------|
| <b>Nicholson (2007;i4)</b><br>Methadone for cancer pain                                                                          | Cancer pain of any intensity, in any setting | 9 trials: all R, C, and 6 DB                           | 459                               | Any dose (single or multiple), any route, placebo or different active comparators    | Methadone has a similar efficacy to morphine in treating cancer pain, and is no more effective than morphine for cancer-related nerve related pain. Its side effect profile is similar to morphine, but these side effects may become more prominent with repeated dosing.   | Conclusions limited by variations in trial design, dosing regimens and limited presentation of primary outcome data. Only one trial attempts to mimic use of methadone in clinical practice (regular dosing). Insufficient data on different pain syndromes to show differences | Repeated dose studies using methadone at fixed dose intervals is potentially hazardous, making double blind trial against an alternative opioid given regularly almost impossible. Randomization to placebo or methadone for patients with cancer pain is unacceptable to most clinicians. Methodology of future studies should address issues of dose titration schedules, use of standard and comparable pain intensity scores, use of patient reported outcomes only, study size and differentialion of pain syndromes, measures of patient satisfaction and quality of life     |
| <b>Wiffen (2007;i4)</b><br>Oral morphine for cancer pain                                                                         | Moderate/severe cancer pain                  | 54 trials: all R, C<br>Max 17 trials in any comparison | 3749<br>Max 973 in any comparison | Single/multiple dose, different formulations, different doses, different comparators | Oral morphine is an effective analgesic for some patients with cancer pain. Titration to pain relief is possible using modified release morphine. Adverse effects common but often tolerable. Small number of patients do not benefit or develop intolerable adverse effects | Qulaity of tirals disappointing. Trials designed to show equivalence not effectiveness. Many small, crossover design without adequate washout, inconsistent reporting of adverse event withdrawals                                                                              | Need to assess pain and pain relief by means of patient-reported validated scales, and to present data that can be related to individual subjects rather than aggregated or mean data                                                                                                                                                                                                                                                                                                                                                                                               |
| <b>Dewey (2007:i1)</b><br>Eicosapentaenoic acid (EPA, an omega-3 fatty acid from fish oils) for the treatment of cancer cachexia | Cancer cachexia                              | 5 trials: all R, C, 4 DB                               | 587                               | Oral fish oil dietary supplement                                                     | There is insufficient evidence to recommend the use of EPA in clinical practice. There is little evidence of harm                                                                                                                                                            | There is a paucity of well-conduceted RCTs to answer the review question                                                                                                                                                                                                        | There is a need to conduct good quality, large scale RCTs using EPA compared to placebo with different cancer types. Issues around clinical stage at recruitment, clinically important outcomes, use of other supportive therapies, and palatability of EPA need to be addressed                                                                                                                                                                                                                                                                                                    |
| <b>Miles (2006;i4)</b><br>Laxatives for the management of constipation in palliative care patients                               | Cancer                                       | 3 trials: all R, open                                  | 163                               | Five different laxatives (or combinations), different doses                          | All treatments had limited efficacy (ineffective for significant numbers of patients). Unable to distinguish between treatments                                                                                                                                              | Too few comparative studies of laxatives or combinations of laxatives to determine "best" treatment for constipation                                                                                                                                                            | Important to consider degenerative neurological disease, AIDS, end stage organ system failure, dementia and chronic lung disease alongside cancer in the palliative care setting. Randomised, controlled trials in clearly defined populations, measuring standardized, clinically relevant outcomes are required. Need comparisons of efficacy of combination laxatives against single laxatives. Different physical attributes of available laxatives make blinding difficult. Multi-centre studies could help combat high attrition rates and small numbers of eligible patients |

|                                                                                                                                    |                                                                                                                                    |                                                          |      |                                                                                                                                                                                                   |                                                                                                                                                                                               |                                                                                                                                                         |                                                                                                                                                                                                                                                                                                                                                                                                                                                                |
|------------------------------------------------------------------------------------------------------------------------------------|------------------------------------------------------------------------------------------------------------------------------------|----------------------------------------------------------|------|---------------------------------------------------------------------------------------------------------------------------------------------------------------------------------------------------|-----------------------------------------------------------------------------------------------------------------------------------------------------------------------------------------------|---------------------------------------------------------------------------------------------------------------------------------------------------------|----------------------------------------------------------------------------------------------------------------------------------------------------------------------------------------------------------------------------------------------------------------------------------------------------------------------------------------------------------------------------------------------------------------------------------------------------------------|
| <b>Dennert (2006;i3)</b><br>Selenium for alleviating the side effects of chemotherapy, radiotherapy and surgery in cancer patients | Malignant disease treated with tumour specific therapy (chemo, radiotherapy, surgery)<br>Any stage of disease, adults and children | 2 trials: both R, C (one presenting preliminary results) | 123  | Inorganic selenium supplements, diff dosage regimens, different durations                                                                                                                         | There is insufficient evidence to recommend selenium supplements to relieve side effects of chemotherapy, radiotherapy or surgery, or improve QoL in cancer patients                          | Lack of primary data contrasts with number of secondary publications recommending use, and proportion of cancer patients using selenium supplements     | Adequate dosage-finding study required, with adequate reporting of completed, ongoing and future trials                                                                                                                                                                                                                                                                                                                                                        |
| <b>Martinez-Zapata (2006;i3)</b><br>Calcitonin for metastatic bone pain                                                            | Metastatic bone pain (both trials in breast cancer patients)                                                                       | 2 trials: both R, C                                      | 90   | Drug, dose and route consistent, but duration different                                                                                                                                           | Limited evidence does not support the use of calcitonin to control pain from metastases                                                                                                       | No data for clinically useful outcomes other than pain                                                                                                  | Need more double blind, parallel clinical trials using long-term evaluations, with realistic sample size calculations, including adequate estimations of number of patients likely to be lost to follow-up.<br>Alternatively, variables studied should be confined to reduction/absence of pain, adverse effects, and QOL. Possible complications of bone metastases such as hypercalcemia, bone fractures or radicular compression, should also be quantified |
| <b>Tsao (2006;i3)</b><br>Whole brain radiotherapy for the treatment of multiple brain metastases                                   | Multiple metastases to the brain from any primary cancer                                                                           | 24 trials: various designs, not all full publications    | 6353 | Different fractionation schedules (9); WBRT with vs without systemic therapy (5), various radiosensitisers (5) or radiosurgery (4); WBRT plus steroids vs steroids alone (1)                      | No additional benefit (survival, neurologic function or symptom control) over standard WBRT for altered dose schedules. Use of adjunctive chemotherapy or radiosensitisers still experimental | Lack of evidence for WBRT vs supportive care, and criteria to help select best treatment for different categories of patients                           | Future trials should examine use of whole brain radiotherapy versus supportive care alone in patients with multiple brain metastases. Clinically relevant outcomes should be defined, including quality of life, symptom control, neurological function, optimal timing of radiosurgery in relation to whole brain radiotherapy, steroid toxicity, and overall survival                                                                                        |
| <b>Ezzo (2006;i2)</b><br>Acupuncture-point stimulation for chemotherapy-induced nausea or vomiting                                 | Cancer patients with chemotherapy-induced nausea and/or vomiting                                                                   | 11 trials: all R, C                                      | 1247 | Different stimulation techniques (manual and electroacupuncture, acupressure, non-invasive electrostimulation) and controls (sham, non-sham)<br>Therapy adjunctive to antiemetics - some outdated | Electroacupuncture seems to protect against acute vomiting, and acupressure against acute nausea                                                                                              | Methodology of included trials mixed.<br>Studies needed in refractory patients and using modern antiemetics to determine clinical relevance of findings | Lack of sham control in some studies made it difficult to interpret nausea scores, a subjective outcome. Lack of concurrent modern antiemetics in electroacupuncture studies, makes it impossible to assess whether acupuncture can offer adjunctive benefit on top of modern antiemetics                                                                                                                                                                      |
| <b>Zeppetella (2006;i1)</b><br>Opioids for the management of breakthrough (episodic) pain in cancer patients                       | Breakthrough cancer pain, in any setting                                                                                           | 4 trials: all R, C                                       | 393  | Oral transmucosal fentanyl citrate (OTFC) dose titration (2), vs sr morphine (1), or vs placebo (1)                                                                                               | OTFC effective for control of breakthrough pain, and preferred to sr morphine. Dose needs to be determined by titration                                                                       | Few, small trials, and no evidence for other opioids                                                                                                    | Included studies confirm that randomised controlled studies are possible in palliative care setting. The randomised trial literature for the management of breakthrough pain is small and no trials were found for other opioids                                                                                                                                                                                                                               |

|                                                                                                                                                        |                                                                                               |                                                |                                          |                                                                                                                                                            |                                                                                                                                                                                                                                                                                       |                                                                                                                                                                                                 |                                                                                                                                                                                                                                                                                                                                                                                                                                                                                                                                                                                                                                        |
|--------------------------------------------------------------------------------------------------------------------------------------------------------|-----------------------------------------------------------------------------------------------|------------------------------------------------|------------------------------------------|------------------------------------------------------------------------------------------------------------------------------------------------------------|---------------------------------------------------------------------------------------------------------------------------------------------------------------------------------------------------------------------------------------------------------------------------------------|-------------------------------------------------------------------------------------------------------------------------------------------------------------------------------------------------|----------------------------------------------------------------------------------------------------------------------------------------------------------------------------------------------------------------------------------------------------------------------------------------------------------------------------------------------------------------------------------------------------------------------------------------------------------------------------------------------------------------------------------------------------------------------------------------------------------------------------------------|
| <b>Berenstein (2005;i2)</b><br>Megestrol acetate for the treatment of anorexia-cachexia syndrome                                                       | Anorexia-cachexia due to cancer, AIDs or other pathologies (3445 cancer, 435 AIDs, 243 other) | 30 trials: all R, C                            | 4123<br>Only 50% contributed to analysis | Different doses, placebo and/or active control, dose response<br>Different durations                                                                       | Megestrol acetate improves appetite and weight gain in cancer patients. No evidence of dose response. No overall conclusion about QOL possible due to heterogeneity. Insufficient data for AIDs and other patients. Adverse event rate low                                            | Limited by quality of primary studies, and number in non-cancer patients                                                                                                                        | Results of meta-analysis are influenced by the quality of primary studies included. Studies of low methodological quality can alter the interpretation of the benefit of intervention. In this review 64% of studies were assessed as moderate or low quality trials. Studies with more than 50% of patients lost to follow-up were excluded from the analysis. Quality of life is a subjective measure and such measures must be valid and reliable                                                                                                                                                                                   |
| <b>Ahmed (2005;i1)</b><br>Supportive care for patients with gastrointestinal cancer                                                                    | Advanced, metastatic gastric or colotrectal cancer                                            | 4 trials: all R, C                             | 483                                      | Four different chemo regimens compared to different packages of supportive care (2) or best supportive care (2)                                            | Addition of chemotherapy to supportive care gives benefit in survival and quality of life. Insufficient evidence on pain or symptom control                                                                                                                                           | Need more larger studies with standardised outcomes of clinical relevance, and clearer definitions of best supportive care                                                                      | Need validated instruments that examine symptom control, quality of life, toxicity, pain severity and pain relief in addition to survival and other palliative measures, both before and after treatment completion. Upper age limits in trials do not reflect the age distribution of the disease. Need improved criteria for including supportive care interventions into cancer RCTs                                                                                                                                                                                                                                                |
| <b>Ballantyne (2005;i1)</b><br>Comparative efficacy of epidural, subarachnoid, and intracerebroventricular opioids in patients with pain due to cancer | Intractable cancer pain                                                                       | No controlled trials<br>72 uncontrolled trials | 2402                                     | Drug, dose, dosing schedule not considered - just route of administration                                                                                  | IVC is at least as effective as EPI or SC opioids for refractory cancer pain. Different routes associated with slightly different adverse event profiles                                                                                                                              | Uncontrolled trials can provide only weak evidence and may well be skewed by unbalance populations (confounding by indication)                                                                  | Patients entering trials of ICV are varied and we may not be comparing equivalent populations. ICV population apparently had more advanced disease and worse pain. More rigorous reporting of efficacy and complications is required – multiple uncontrolled trials were reported on                                                                                                                                                                                                                                                                                                                                                   |
| <b>McNicol (2005;i1)</b><br>NSAIDs or paracetamol, alone or combined with opioids, for cancer pain                                                     | Cancer pain not limited to palliative setting                                                 | 42: all R, C                                   | 3084                                     | Different NSAIDs and combinations, different comparators, different doses, different routes of administration, single/multiple dosing, different durations | Limited data indicate that NSAIDs are more effective than placebo, but do not show differences between drugs. Combination with opioid shows no difference to slight benefit. Short duration of studies limits clinical relevance. WHO pain ladder step 2 is not supported by evidence | Conclusions limited by heterogeneity in studies and clinical relevance. Few trials contributed to any one subcategory of analysis                                                               | Heterogeneity of study designs prevented comprehensive meta-analysis and prevented definitive conclusions, despite large number of patients. Cancer pain generally chronic in nature so inappropriate to use methods for deriving dichotomous outcome measures from continuous data in acute pain studies (McQuay, 1998). Use of placebo for pain management in cancer trials may be unethical (Jacox 1994). Studies to ascertain whether addition of opioid to NSAID regimen actually increases efficacy and/or reduces side effects are required. Need to establish safety and efficacy of chronic NSAID use in patients with cancer |
| <b>Shaw (2005;i1)</b><br>Pleurodesis for malignant pleural effusions                                                                                   | Malignancy leading to pleural effusion                                                        | 36 trials: all R, all open                     | 1499                                     | Many sclerosants used, predominantly bleomycin, tetracycline and talc. Bedside or thoracoscopic pleurodesis                                                | Thoracoscopic pleurodesis with talc may be the optimal technique. No evidence for increased mortality with technique or individual sclerosant                                                                                                                                         | Need standard definitions of success and failure, and more consistent reporting of adverse events, withdrawals etc. Need studies to determine best technique, timing and management of patients | Standardised criteria should be used for methods of assessing adverse events and toxicity and reporting procedure-related morbidity and mortality. Standardised criteria required to assess success or failure of pleurodesis and clinically relevant quality of life outcomes e.g. breathlessness, cough, discomfort and pain, fatigue, and reduced exercise capability                                                                                                                                                                                                                                                               |

|                                                                                                 |                                                                                          |                                                                                                                    |                                                                             |                                                                                                                                                                                          |                                                                                                                                                                                                                    |                                                                                                                                                                 |                                                                                                                                                                                                                                                                                                                                                                                                                                                                                                                                                                                                                   |
|-------------------------------------------------------------------------------------------------|------------------------------------------------------------------------------------------|--------------------------------------------------------------------------------------------------------------------|-----------------------------------------------------------------------------|------------------------------------------------------------------------------------------------------------------------------------------------------------------------------------------|--------------------------------------------------------------------------------------------------------------------------------------------------------------------------------------------------------------------|-----------------------------------------------------------------------------------------------------------------------------------------------------------------|-------------------------------------------------------------------------------------------------------------------------------------------------------------------------------------------------------------------------------------------------------------------------------------------------------------------------------------------------------------------------------------------------------------------------------------------------------------------------------------------------------------------------------------------------------------------------------------------------------------------|
| <b>Fellows (2004;i3)</b><br>Aromatherapy and massage for symptom relief in patients with cancer | Cancer patients (adults and children) receiving health care in any setting               | 8 trials: all R, C                                                                                                 | 357                                                                         | Massage vs no-massage control (6) and aromatherapy massage vs carrier oil massage (2)<br>Duration of sessions, total treatment period, experience of masseur and nature of oils variable | Massage and aromatherapy massage confer short-term benefits on psychological wellbeing. Anxiety may be reduced, but no evidence for reduction in depression. Insufficient evidence for effect on physical symptoms | Methodological difficulties encountered, particularly of size and blinding<br>Determination of most effective treatment regimen and longer-term outcomes needed | Need longer follow up studies to determine whether short-term effects persist, and larger sample sizes. Most advantageous number of massages, and areas of body to be massaged, using same outcome measures and scales, would also strengthen evidence base                                                                                                                                                                                                                                                                                                                                                       |
| <b>Quigley (2004;i3)</b><br>Opioid switching to improve pain relief and drug tolerability       | Adults and children with chronic or acute pain<br>Not limited to palliative care setting | No RCTs<br>52 reports: case reports (23), retrospective studies/audits (15), prospective uncontrolled studies (14) | Not clear<br>Prospective and retrospective studies ±2000<br>Case reports 55 | Morphine generally first choice and methadone second.<br>Conversion ratios varied or not reported<br>Reason for switch often not reported                                                | Robust evidence for the practice of opioid switching does not exist. Uncontrolled data suggest that for some patients it may improve pain or tolerability                                                          | Studies often small, and open to bias due to poor quality. Publication bias likely                                                                              | Differences in opioid formulation make blinding difficult. Blinding of outcome assessors and patients should be possible, and 'N of 1' trial design. Opioids with similar pharmacokinetic profiles could be compared for toxicity and analgesia in RCTs. Information on which opioids are safe in patients with renal impairment would significantly improve management in these patients. Wide gaps in our understanding of inter-individual variability in opioid response, so need to test hypothesis that opioid switch is useful for some patients with uncontrolled pain and/or intolerable adverse effects |
| <b>Jackson (2004;i2)</b><br>Drug therapy for delirium in terminally ill patients                | AIDs                                                                                     | 1 trial: R, DB                                                                                                     | 30                                                                          | Haloperidol, chlorpromazine and lorazepam. Dose according to recognised protocol                                                                                                         | There is insufficient evidence to draw conclusions about the role of drugs for delirium in palliative care. Haloperidol and chlorpromazine may help, but the latter may cause cognitive impairment                 | Only one study with 30 patients. More research is needed                                                                                                        | To date no randomized, placebo-controlled trials have been conducted in patients with advanced cancer or other terminal disease states. Generates important research questions                                                                                                                                                                                                                                                                                                                                                                                                                                    |
| <b>Jackson (2004;i1)</b><br>Drug therapy for anxiety in palliative care                         |                                                                                          | None                                                                                                               |                                                                             |                                                                                                                                                                                          | There is insufficient evidence to recommend any therapy for anxiety in palliative care                                                                                                                             |                                                                                                                                                                 | Main reasons for study exclusion were (a) patient populations not considered to be specifically terminally ill (b) studies not prospective and with a pharmacotherapeutic comparison. Generated some specific research questions for future research                                                                                                                                                                                                                                                                                                                                                              |
| <b>M Roqué (2003;i4)</b><br>Radioisotopes for metastatic bone pain                              | Metastatic bone pain                                                                     | 4 trials: all R, DB, PC                                                                                            | 325                                                                         | Different drugs, different doses, single/multiple doses, different duration                                                                                                              | Some evidence that radioisotopes may give complete pain relief in the short term, but with increased risk of serious adverse events. No effect on spinal cord compression. No data for long term                   | Trials were too small and too short-term for results to be meaningful. No data for other clinically useful outcomes                                             | Need rigorous parallel, double blind clinical trials including long-term evaluations and larger sample sizes, with properly estimated losses to follow up due to mortality or disease progression. Clinically relevant questions to address include which compounds are most beneficial, optimal dose and administration route, when prophylactic therapy for bone complications should be started, identification of groups that benefit most from therapy, and cost-effectiveness of each compound                                                                                                              |

|                                                                                                                                                    |                                                                               |                                                                                                           |              |                                                                                                                                       |                                                                                                                                                                                                                              |                                                                                                                                                   |                                                                                                                                                                                                                                                                                                                                                                                                                                                                                                                                                                     |
|----------------------------------------------------------------------------------------------------------------------------------------------------|-------------------------------------------------------------------------------|-----------------------------------------------------------------------------------------------------------|--------------|---------------------------------------------------------------------------------------------------------------------------------------|------------------------------------------------------------------------------------------------------------------------------------------------------------------------------------------------------------------------------|---------------------------------------------------------------------------------------------------------------------------------------------------|---------------------------------------------------------------------------------------------------------------------------------------------------------------------------------------------------------------------------------------------------------------------------------------------------------------------------------------------------------------------------------------------------------------------------------------------------------------------------------------------------------------------------------------------------------------------|
| <b>Bell (2003;i3)</b><br>Ketamine as an adjuvant to opioids for cancer pain                                                                        | Cancer pain                                                                   | 2 trials: both R, DB, cross-over, adjuvant therapy. 32 case reports or uncontrolled studies also reviewed | 30           | Ketamine, either iv or intrathecal. Different doses, one used washout, other did not                                                  | Insufficient evidence to assess ketamine as adjuvant to morphine                                                                                                                                                             | Need larger trials and to consider opioid tolerance, nature of pain, and route of administration. Need well defined, clinically relevant outcomes | Provides good framework for future studies. Difficult to recruit patients for trials could be addressed by crossover design, which may be more appropriate than placebo-controlled parallel studies. Need standardisation of doses and reported pain, large numbers of patients, and to address issue of possible effect of ketamine in prevention of opioid tolerance. Identification of clinically relevant outcomes is paramount i.e. effective doses and adverse events. In-house data bases from pharmaceutical companies may be an effective way of searching |
| <b>Hirst (2002;i4)</b><br>Benzodiazepines and related drugs for insomnia in palliative care                                                        | Palliative care                                                               | None                                                                                                      |              |                                                                                                                                       | Extensive searching failed to identify any RCTs of benzodiazepines for insomnia in palliative care settings                                                                                                                  |                                                                                                                                                   | Need large, good quality randomized controlled trials involving representative patients with incurable progressive medical conditions, with explicit subjective complaints of insomnia, of sufficient duration, and measurement of all relevant outcomes. Outcome measures should involve subjective evaluations of sleep quality and adequately monitor adverse effects                                                                                                                                                                                            |
| <b>Wong (2002;i2)</b><br>Bisphosphonates for the relief of pain secondary to bone metastases                                                       | Bony metastases from any primary neoplasm                                     | 30 trials: all R, 21 DB and PC, 4 open, 5 active (dose response)                                          | 3582         | Etidronate (3), clodronate (15), pamidronate (12)<br>Oral, iv or mixture<br>Different doses                                           | Bisphosphonates provide modest pain relief for patients with painful bony metastases                                                                                                                                         | Data available for meta-analysis are so limited that no robust conclusions can be reached                                                         | Most important and clinically relevant endpoint for inclusion in quantitative reviews is proportion of patients with pain relief, described for each arm of the trial. Mean pain scores are not helpful                                                                                                                                                                                                                                                                                                                                                             |
| <b>Jennings (2001;i3)</b><br>Opioids for the palliation of breathlessness in terminal illness                                                      | Mainly COPD, some cancer, cardiac failure, lung disease<br>Mostly outpatients | 18 trials: all R, DB, PC, cross-over                                                                      | 292          | Dihydrocodeine, diamorphine, morphine<br>Different doses, formulations - oral, (standard, immediate, slow release), sc, iv, nebulised | Strong evidence for small, probably clinically significant effect of oral and parenteral opioids on breathlessness<br>No evidence for benefit from nebulised opioids for breathlessness or any opioid for exercise tolerance | Limited by small numbers of patients, and lack of standardised outcomes and reporting                                                             | Need trials with larger numbers of patients, using standardised protocols. Variety of different outcome measures were used in breathlessness studies. Even within one measure (eg Borg score), outcome often reported differently (often not at fixed point relative to exercise). Quality of life measures needed. Problems of using different types of palliative care patients stem from fact that cancer patients are more heterogeneous than COPD patients                                                                                                     |
| <b>Feuer (1999;i3)</b><br>Corticosteroids for the resolution of malignant bowel obstruction in advanced gynaecological and gastrointestinal cancer | Advanced gynae or gi cancer<br>Any age, inpatient or outpatient               | 3 trials: all R, DB, PC<br>[7 uncontrolled pro and retrospective studies were not included in analysis]   | 89 in trials | Dexamethasone (2), methylprednisolone (1) at two doses<br>All iv                                                                      | Non-significant trend for improvement in bowel obstruction with corticosteroids.<br>Treatment may palliate symptoms without affecting morbidity                                                                              | Strength of evidence limited by small numbers and relevance of outcomes measured                                                                  | Highlights problems with recruitment. Quality of life should be a primary outcome measure. The longer patients survive, the more significant side effects may become                                                                                                                                                                                                                                                                                                                                                                                                |

|                                                                                             |                                            |                                                         |      |                                                                                                                                                                          |                                                                                                                                                                         |                                                                                                                 |                                                                                  |
|---------------------------------------------------------------------------------------------|--------------------------------------------|---------------------------------------------------------|------|--------------------------------------------------------------------------------------------------------------------------------------------------------------------------|-------------------------------------------------------------------------------------------------------------------------------------------------------------------------|-----------------------------------------------------------------------------------------------------------------|----------------------------------------------------------------------------------|
| <b>McQuay (1999;i3)</b><br>Radiotherapy for the<br>palliation of painful<br>bone metastases | Bony metastases from<br>any primary tumour | 20 trials: all R, C<br>(blinding often not<br>possible) | 3060 | External irradiation (6):<br>comparisons of 43 different<br>schedules<br>Radioisotope (8): strontium<br>as mono or combined<br>therapy (6), rhenium (2),<br>samarium (1) | External irradiation and<br>radioisotopes can provide<br>effective analgesia<br>Diverse patients, treatment<br>schedules etc did not permit<br>comparisons between them | Compromises made in<br>analysis to get as much<br>information as possible<br>without creating false<br>validity | Trials heterogeneous: 20 trials yielding 43 different fractionation<br>schedules |
|---------------------------------------------------------------------------------------------|--------------------------------------------|---------------------------------------------------------|------|--------------------------------------------------------------------------------------------------------------------------------------------------------------------------|-------------------------------------------------------------------------------------------------------------------------------------------------------------------------|-----------------------------------------------------------------------------------------------------------------|----------------------------------------------------------------------------------|

---

R=randomised; DB=double blind; C=controlled; PC=placebo controlled
