# Supplementary material for: How useful are systematic reviews for informing palliative care practice? Survey of 25 Cochrane systematic reviews
Source: PubMed Central journal article supplement (PMC2532992; doi:10.1186/1472-684x-7-13), 2008-08-20
Supplement: 1472-684X-7-13-S3.pdf [file 1472-684X-7-13-S3.pdf]

### Additional file 3: Quality and validity tools

| Tool                            | Criteria considered                                                                                                                                                                                                                                |
|---------------------------------|----------------------------------------------------------------------------------------------------------------------------------------------------------------------------------------------------------------------------------------------------|
| Oxford Quality Score [32]       | Randomisation process; blinding process; reporting of withdrawals and dropouts. Max score 5                                                                                                                                                        |
| Oxford Pain Validity Score [33] | Blinding, size, population characteristics, outcome definition, statistical procedures, reporting of withdrawals and dropouts. Max score 16                                                                                                        |
| Rinck [1]                       | Accrual of study population; patient characteristics; randomisation; attrition and statistical power; definition and execution of interventions; relevance, timing and measurement of outcomes; presentation of results. Max score 7               |
| Detsky [34]                     | Randomisation process; outcome assessment, inclusion and exclusion criteria; details of intervention, appropriateness of statistics. Max score 15                                                                                                  |
| Juni [35]                       | Randomisation process; similarity of groups at baseline; blinding; eligibility criteria; provision of care and follow up; reporting of protocol deviations, withdrawals and dropouts; reporting of outcomes, statistical procedures (ITT analysis) |
| Delphi [36]                     | Randomisation process; similarity of groups at baseline; blinding; eligibility criteria; provision of care and follow up; reporting of outcomes; ITT analysis                                                                                      |
| Cochrane Handbook [37]          | Similarity of groups at baseline; blinding; eligibility criteria; provision of care and follow up; reporting of protocol deviations, withdrawals and dropouts; reporting of outcomes, statistical procedures. Max score 8                          |
| NHS Cancer Services [38]        | Uses concept of hierarchy of evidence: Grade I (strong) RCT or review of RCTs; Grade II (fairly strong) prospective study with comparison group; Grade III (weak) retrospective study; Grade IV (weak) cross-sectional study                       |
| Ezzo [12]                       | Randomisation; allocation; use of sham control; outcome assessor blinding; reporting of withdrawals and dropouts                                                                                                                                   |
| Cochrane Handbook [39]          | Allocation concealment: A adequate; B uncertain; C inadequate; D not used                                                                                                                                                                          |

---
